# Supplementary material for: Effect of Cytomegalovirus Reactivation on Inflammatory Status and Mortality of Older COVID-19 Patients
Source: MDPI journal article supplement (doi:10.3390/ijms24076832), 2023-04-06
Supplement: s1 [file s1]

# Effect of cytomegalovirus reactivation on inflammatory status and mortality of older COVID-19 patients

Robertina Giacconi<sup>1\*</sup>, Maurizio Cardelli <sup>1</sup>, Francesco Piacenza<sup>1</sup>, Elisa Pierpaoli<sup>1</sup>, Elisabetta Farnocchia<sup>1</sup>, Mirko Di Rosa<sup>2</sup>, Anna Rita Bonfigli<sup>3</sup>, Tiziana Casoli<sup>4</sup>, Francesca Marchegiani<sup>5</sup>, Fiorella Marcheselli<sup>5</sup>, Rina Recchioni<sup>5</sup>, Pierpaolo Stripoli<sup>5</sup>, Roberta Galeazzi<sup>6</sup>, Antonio Cherubini<sup>7</sup>, Massimiliano Fedecostante<sup>7</sup>, Riccardo Sarzani<sup>8</sup>, Chiara Di Pentima<sup>8</sup>, Piero Giordano<sup>8</sup>, Roberto Antonicelli<sup>9</sup>, Mauro Provinciali<sup>1</sup> and Fabrizia Lattanzio<sup>3</sup>

<sup>1</sup> Advanced Technology Center for Aging Research, IRCCS INRCA, Ancona, Italy

<sup>2</sup> Unit of Geriatric Pharmacoepidemiology and Biostatistics, IRCCS INRCA, Ancona, Italy

<sup>3</sup> Scientific Direction, IRCCS INRCA, Ancona, Italy

<sup>4</sup> Center for Neurobiology of Aging, IRCCS INRCA, Ancona, Italy

<sup>5</sup> Center of Clinical Pathology and Innovative Therapy, IRCCS INRCA, Ancona, Italy

<sup>6</sup> Clinical Laboratory and Molecular Diagnostic, Italian National Research Center on Aging, IRCCS INRCA, Ancona, Italy

<sup>7</sup> Geriatrics, Accettazione geriatrica e Centro di ricerca per l'invecchiamento, IRCCS INRCA, Ancona, Italy

<sup>8</sup> Department of Clinical and Molecular Sciences, Università Politecnica delle Marche, Ancona, Italy; Internal Medicine and Geriatrics, Italian National Research Centre on Aging, Hospital "U. Sestilli", IRCCS INRCA, Ancona, Italy

<sup>9</sup> Cardiology Unit, IRCCS INRCA, 60129 Ancona, Italy.

\* Correspondence: E-mail: [r.giacconi@inrca.it](mailto:r.giacconi@inrca.it); Advanced Technology Center for Aging Research, IRCCS INRCA, Via Birarelli 8, 60121 Ancona, Italy; Tel: +390718004213; Fax +39071206791

**Table S1 CMV IgM antibodies in COVID-19 patients**

| CMV DNAemia<br>positive samples<br>n. 19  | CMV IgM n. (%) |          |               |                |
|-------------------------------------------|----------------|----------|---------------|----------------|
|                                           | Negative       | Positive | Not available | Dubious result |
|                                           | 11 (58%)       | 4 (21%)  | 2 (10.5%)     | 2 (10.5%)      |
| CMV DNAemia<br>negative samples<br>n. 137 | 118 (86.1%)    | 6 (4.4%) | 7 (5.1%)      | 6(4.4%)        |

**Table S2 Serum cytokine concentrations in COVID-19 patients according to CMV IgM or DNAemia positivity**

|                       | CMV IgM negative | CMV IgM positive | CMV DNAemia<br>positive |
|-----------------------|------------------|------------------|-------------------------|
| IL-6 (pg/mL)          | 157.6±24.9       | 133.3±87.1       | 149.9±74.1              |
| IL-10 (pg/mL)         | 162.4±46.2       | 103.2±161.4      | 113.1±137.6             |
| IFN- $\gamma$ (pg/mL) | 53.4±11.9*       | 57.0±31.5*       | 137.6±30.9              |
| TNF- $\alpha$ (pg/mL) | 2.5±1.6**        | 3.8±5.7*         | 22.0±4.3                |

\*p<0.05 compared to CMV DNAemia positive patients

\*\*p<0.001 compared to CMV DNAemia positive patients
